# Supplementary material for: A pan-coronavirus fusion inhibitor targeting the HR1 domain of human coronavirus spike
Source: PubMed Central journal article supplement — Sci Adv. 2019 Apr 10;5(4):eaav4580. doi: 10.1126/sciadv.aav4580 (PMC6457931; doi:10.1126/sciadv.aav4580), 2019-04-10
Supplement: aav4580_SM.pdf [file aav4580_SM.pdf]

## Supplementary Materials for

### **A pan-coronavirus fusion inhibitor targeting the HR1 domain of human coronavirus spike**

Shuai Xia, Lei Yan, Wei Xu, Anurodh Shankar Agrawal, Abdullah Algaissi, Chien-Te K. Tseng, Qian Wang, Lanying Du, Wenjie Tan, Ian A. Wilson\*, Shibo Jiang\*, Bei Yang\*, Lu Lu\*

\*Corresponding author. Email: wilson@scripps.edu (I.A.W.); shibojiang@fudan.edu.cn (S.J.); yangbei@shanghaitech.edu.cn (B.Y.); lul@fudan.edu.cn (L.L.)

Published 10 April 2019, *Sci. Adv.* **5**, eaav4580 (2019)  
DOI: 10.1126/sciadv.aav4580

#### **This PDF file includes:**

- Fig. S1. Interaction between HCoV HR1 and HR2 regions in HCoV S proteins.
- Fig. S2. Identity and similarity in spike protein sequences of SARS-CoV and SL-CoVs and the effect of EK1 on HCoV S protein-mediated cell fusion and virus-cell fusion, as well as the viral loads and histopathological changes in brains of HCoV-infected mice.
- Fig. S3. In vivo safety of EK1 through intranasal administration.
- Fig. S4. Structural comparison between the HR1-EK1 6-HB bundles and cognate HR1-HR2 6-HB bundles reveals that the EK1 peptide binds to the triple-helix HR1 core of different HCoVs in a similar manner to that of the native HR2 of the corresponding HCoV.
- Fig. S5. The EK1 peptide forms 6-helical bundle structures with the HR1 motifs from OC43, HKU1, and NL63.
- Fig. S6. Interactions between the HR1 and HR2 motifs of MERS and 229E.
- Fig. S7. Key residues at critical positions endow EK1 and OC43-HR2 with pan-CoV activity.
- Table S1. Inhibitory activity of peptides on multiple cell-cell fusion assays.
- Table S2. Solubility and fusion inhibitory activities of different peptides.
- Table S3. Data collection and structural refinement statistics.

fig. S1

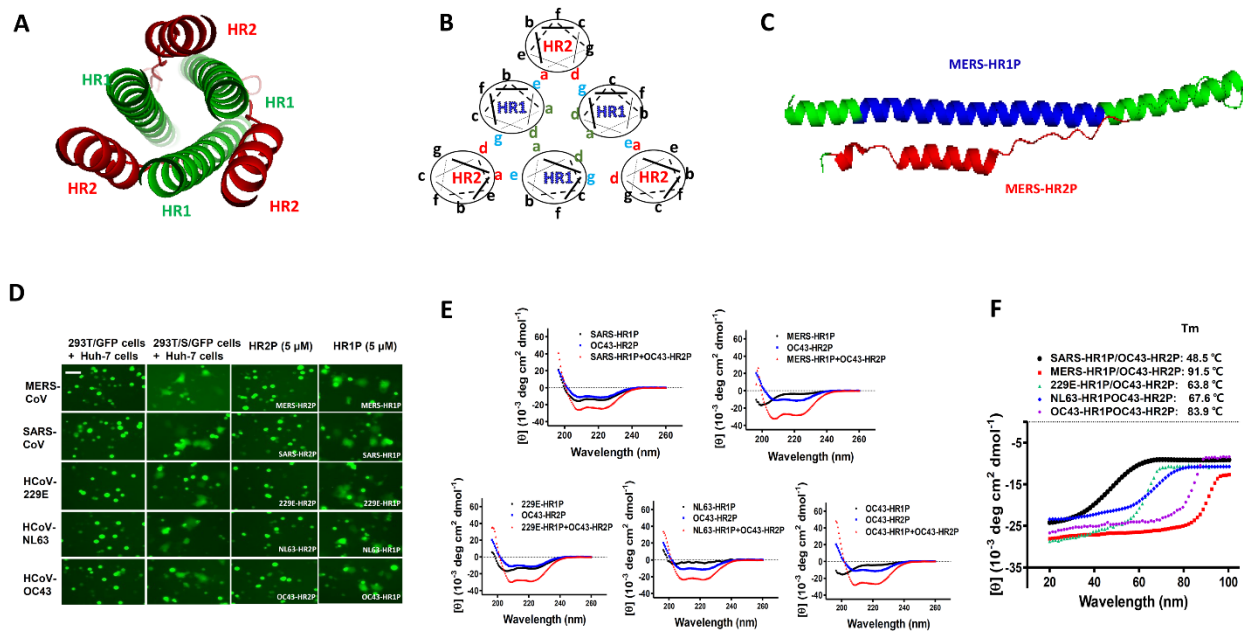

**Fig. S1. Interaction between HCoV HR1 and HR2 regions in HCoV S proteins.** (A) Cartoon of the MERS-CoV 6-HB structure, with HR1 colored in green and HR2 colored in red, respectively (PDB: 4NJL). (B) The three HR1s interact through residues located at the “a” and “d” positions (green) to form the triple-helix trimeric core. Residues of HR1 located at the “e” and “g” positions (blue) interact with “a” and “d” residues (red) in HR2 to form the 6-HB structure. (C) Structural location of MERS-HR1P (green) and MERS-HR2P (red) in MERS-CoV HR1 and HR2 (PDB: 4NJL). (D) Establishment of multiple cell-cell fusion assays mediated by the S protein of MERS-CoV, SARS-CoV, HCoV-229E, HCoV-NL63 and HCoV-OC43, respectively. After Huh-7 cells were co-cultured with 293T/EGFP cells in the absence or presence of 5  $\mu$ M of HR2P or 5  $\mu$ M of HR1P at 37 °C for 2-4 h, cell-cell fusion was imaged under an optical microscope with fluorescence. Scale bar, 800  $\mu$ m. (E) CD spectra of various HR1P/OC43-HR2P complexes in phosphate buffer. (F) The melting curves of various HR1P/OC43-HR2P complexes.

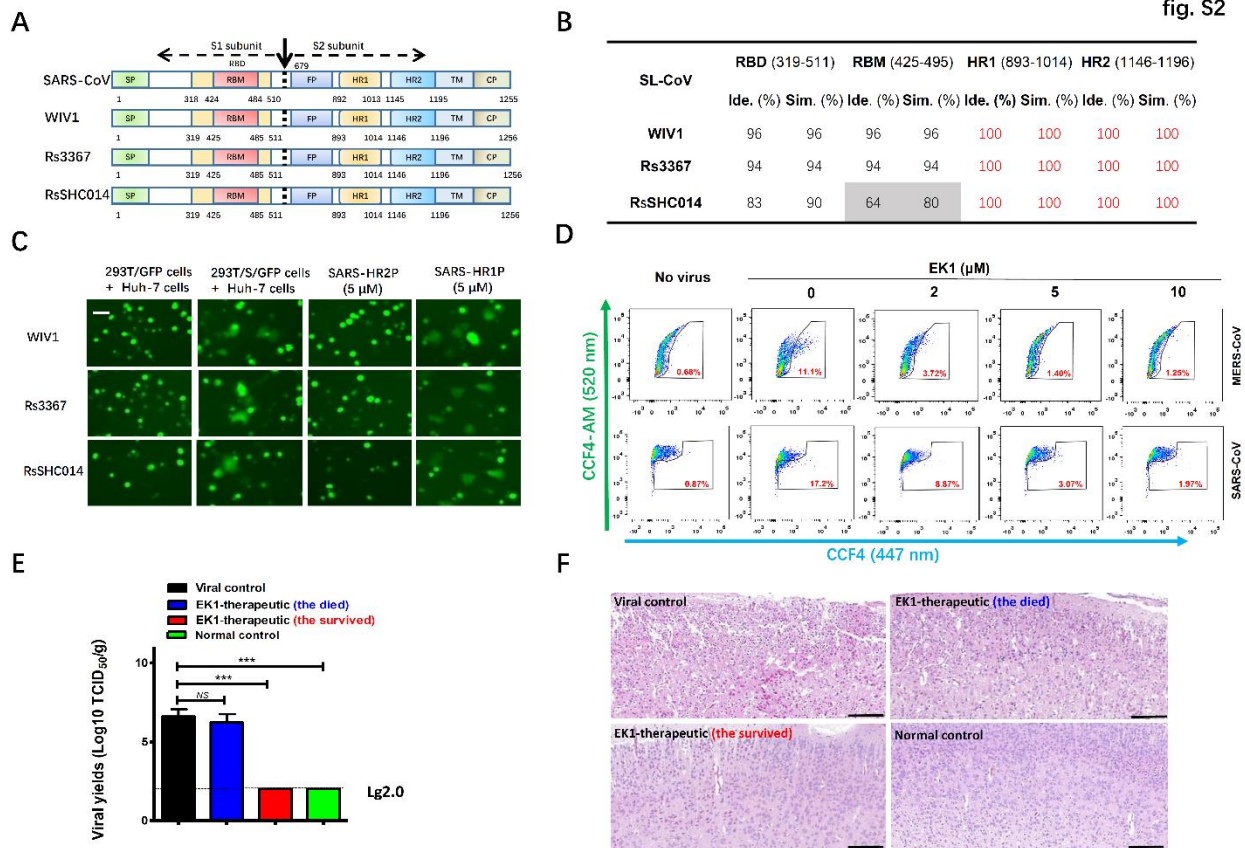

**Fig. S2. Identity and similarity in spike protein sequences of SARS-CoV and SL-CoVs and the effect of EK1 on HCoV S protein-mediated cell fusion and virus-cell fusion, as well as the viral loads and histopathological changes in brains of HCoV-infected mice.** (A) Schematic representation of S proteins of SARS-CoVs and SL-CoVs. Residue numbers correspond to their positions in S protein of SARS-CoV. (B) The identity and similarity of RBD, RBM, HR1 and HR2 sequences of SL-CoVs to those of SARS-CoV. (C) Establishment of the cell-cell fusion systems mediated by S protein of SL-CoV-WIV1, SL-CoV-Rs3367 and SL-CoV-SHC014, respectively. Huh-7 cells and 293T/S/EGFP cells (or 293T/EGFP cells) were co-cultured in the absence or presence of 5  $\mu$ M of SARS-HR2P or 5  $\mu$ M of SARS-HR1P at 37  $^{\circ}$ C for 4 h, and then photographed under fluorescence microscopy. Scale bar, 800  $\mu$ m. (D) EK1 inhibits entry of MERS-CoV and SARS-CoV Blam-Vpr virions into the target cells. (E) The viral load of brains from the viral control mice, HCoV-OC43 infected mice that either survived or died during EK1 therapeutic treatment, and normal control mice. (F) Histological examination of brains from the viral control mice, HCoV-OC43 infected mice that either survived or died during EK1 therapeutic treatment, and normal control mice.

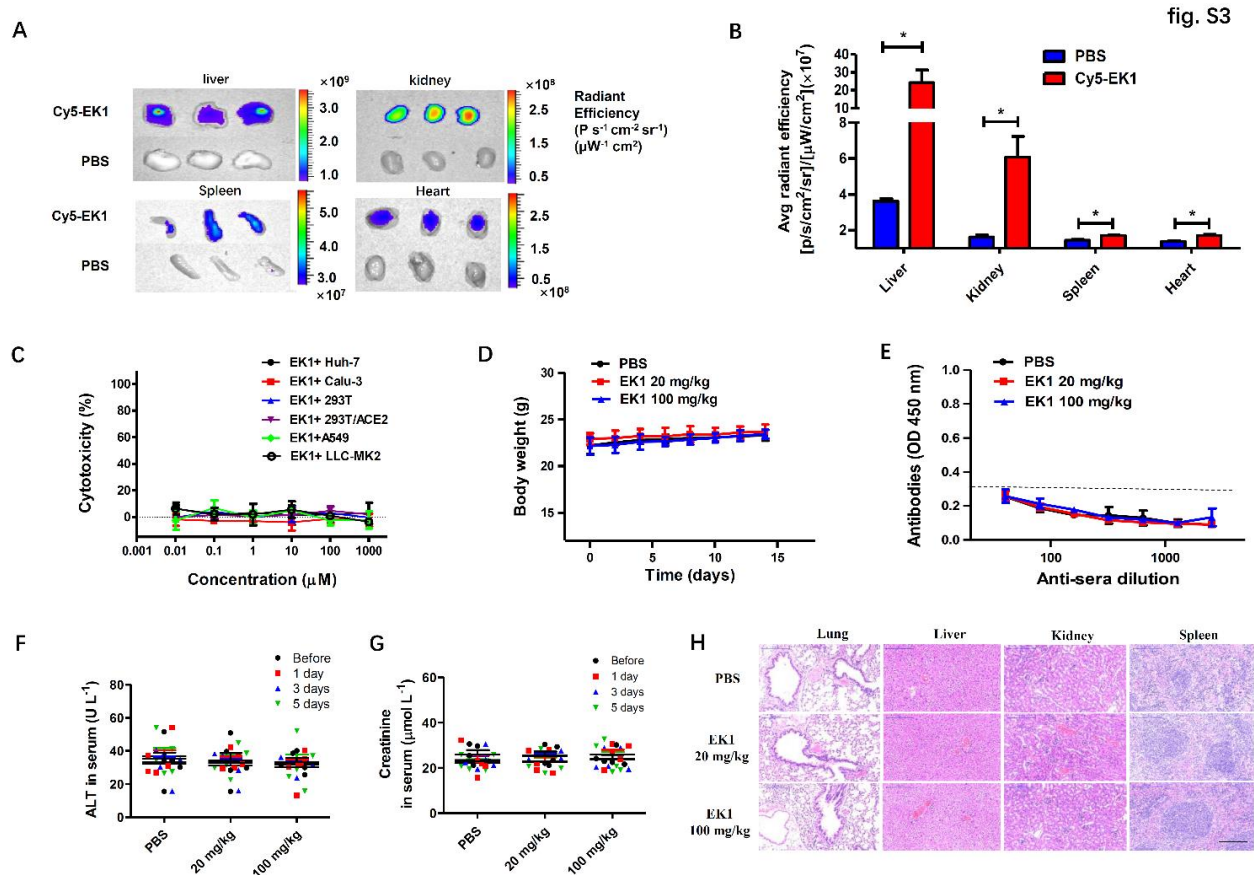

**Fig. S3. In vivo safety of EK1 through intranasal administration.** (A) Distribution of EK1 in other organs after intranasal administration. (B) Statistical analysis of results from B. Data are means  $\pm$  s.d. \* $P < 0.05$ , Student's two-tailed t-test. (C) Cytotoxicity of EK1 on various target cells. No cytotoxicity of EK1 was found on Huh-7, A549, LLC-MK2, Calu-3, 293T and 293T/ACE2 cells. Data are means  $\pm$  s.d. of triplicate samples from a representative experiment. (D) Body weight change of each group of mice treated with EK1 (20 mg/kg), EK1 (100 mg/kg), or PBS was recorded up to 2 weeks post-treatment. (E) The titer of IgG sera to EK1 in each group of mice two weeks post-treatment. (F) ALT in the sera of each group of mice before the first treatment and 1, 3 and 5 days post-final treatment. All error bars reflect s.d. (G) Creatinine in the sera of the mice at the above time points. All error bars reflect s.d. (H) Comparison of hematoxylin and eosin staining of organ tissues, including lung, liver, kidney, spleen from each group of mice. Scale bar, 200  $\mu$ m.

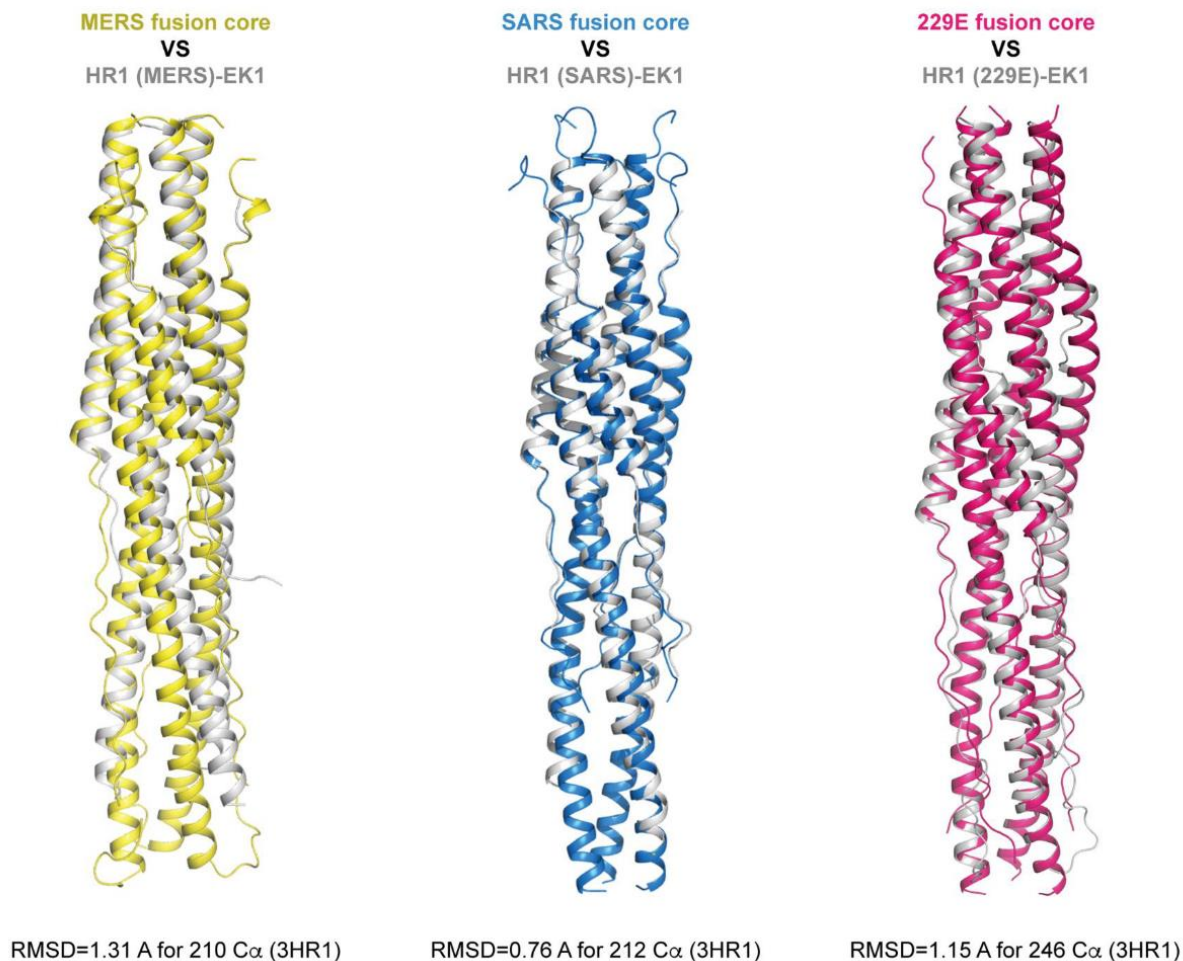

**Fig. S4. Structural comparison between the HR1-EK1 6-HB bundles and cognate HR1-HR2 6-HB bundles reveals that the EK1 peptide binds to the triple-helix HR1 core of different HCoV in a similar manner to that of the native HR2 of the corresponding HCoV.** The superposition shows overlaps of EK1 and HR2 and no major conformational changes in HR1 upon EK1 binding as compared to HR2. The crystal structure of HR1(MERS)-L6-EK1 was aligned with 3HR1(MERS)-3HR2 fusion-core structures (PDBid: 4nj1) with an RMSD of 1.31 Å over 210 equivalent C $\alpha$ 's from three HR1s. The structure of HR1(SARS)-L6-EK1 or HR1(229E)-L6-EK1 was aligned with corresponding fusion-core structures (PDBid: 1wyj and 5yl9) with an RMSD of 0.76 Å over 212 equivalent C $\alpha$ 's and 1.15 Å over 246 equivalent C $\alpha$ 's, respectively.

fig.S5

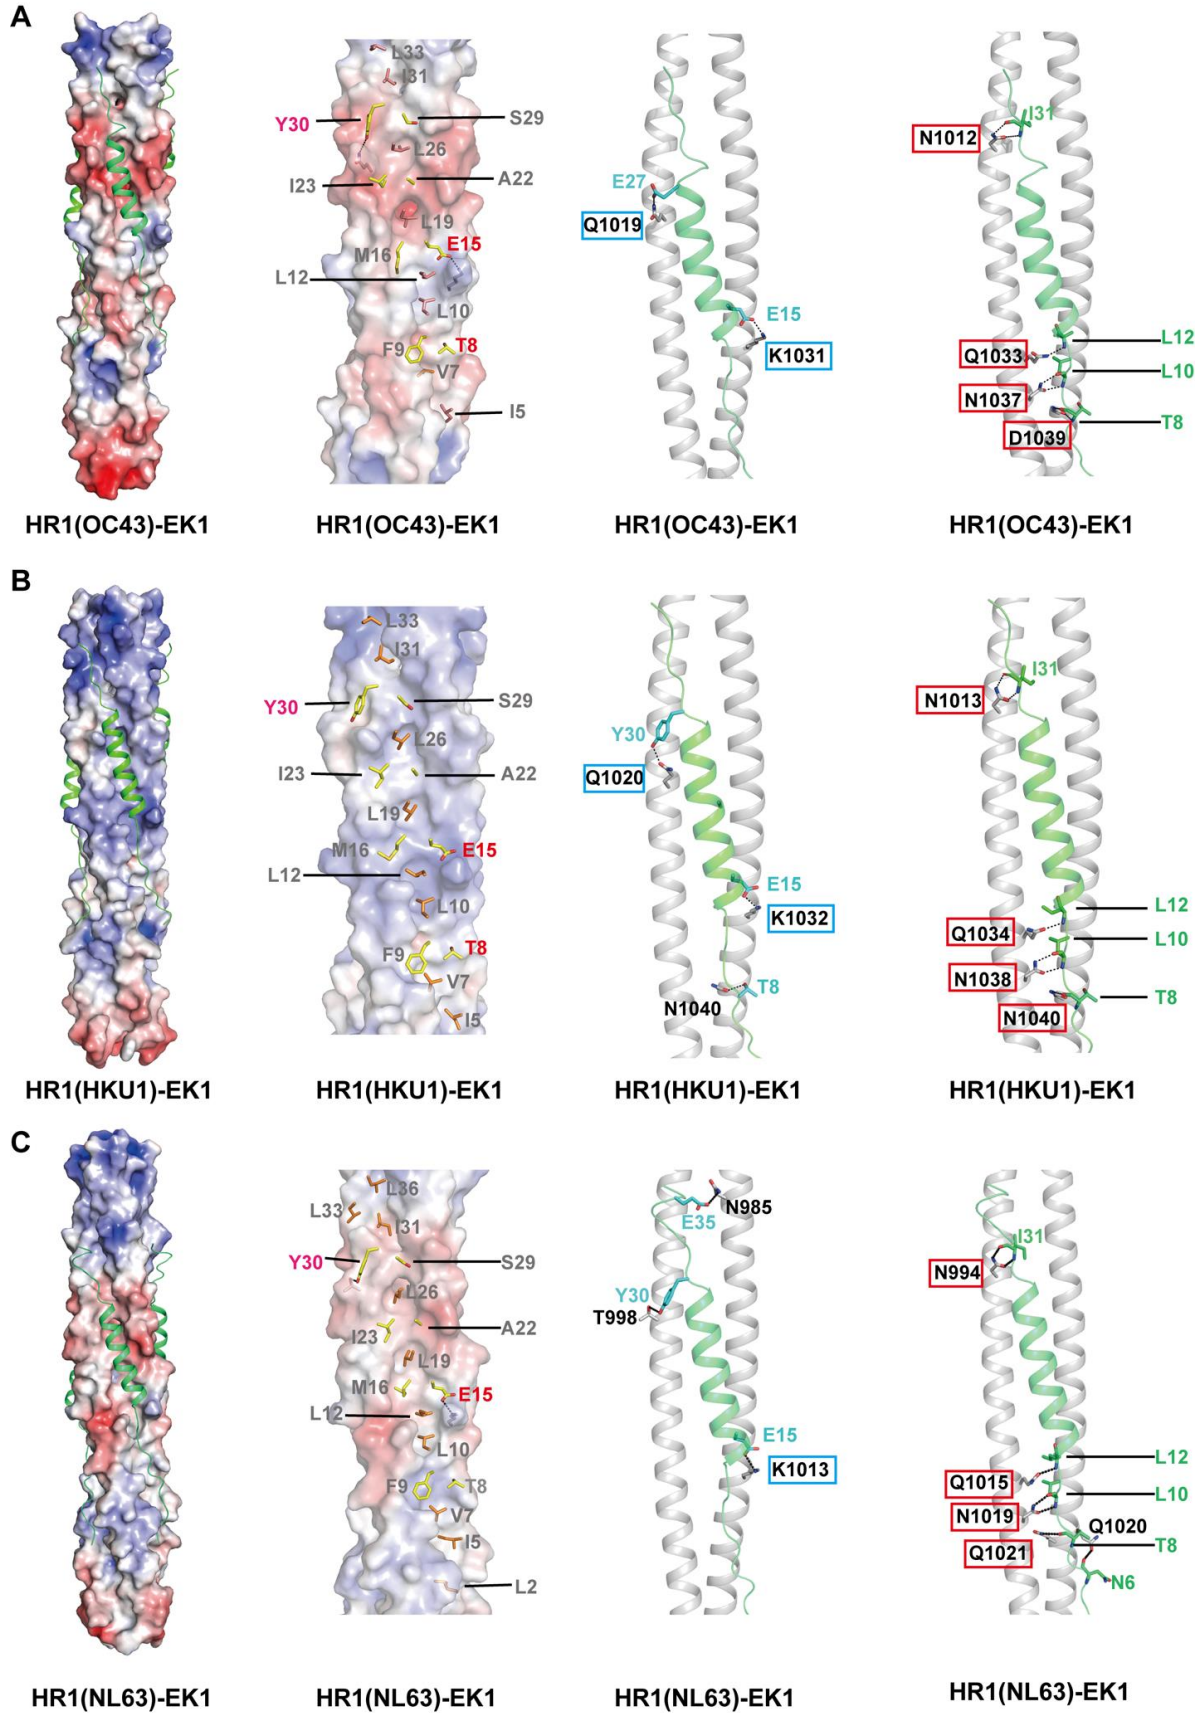

**Fig. S5. The EK1 peptide forms 6-helical bundle structures with the HR1 motifs from OC43, HKU1, and NL63.** (A-C) 1st panel: overall structures, of HR1-EK1 complexes, with the 3HR1 cores illustrated as electrostatic surfaces and EK1 depicted as a ribbon diagram; 2<sup>nd</sup> panel: hydrophobic packings between EK1 and corresponding triple-helix HR1 hydrophobic cores, note that the extensive hydrophobic packing between EK1 and OC43, HKU1 or NL63 3HR1 cores is conserved, when compared to that between EK1 and SARS-CoV, MERS-CoV or HCoV-229E. Residues on EK1 that are involved in hydrophobic packing are shown as stick models on the electrostatic surfaces of 3HR1 cores; 3<sup>rd</sup> panel: side-chain to side-chain hydrophilic interactions between EK1 and corresponding triple-helix HR1 cores. HR1 residues of HCoV-OC43, HCoV-HKU1 and HCoV-NL63 that mediate highly conserved side-chain to side-chain hydrophilic interactions with EK1 residues are boxed in cyan; 4<sup>th</sup> panel: main-chain to side-chain polar interactions between EK1 and corresponding triple-helix HR1 cores. The HR1 residues of HCoV-OC43, HCoV-HKU1 and HCoV-NL63 that mediate highly conserved side-chain to main-chain hydrophilic interactions with EK1 residues are boxed in red.

fig.S6

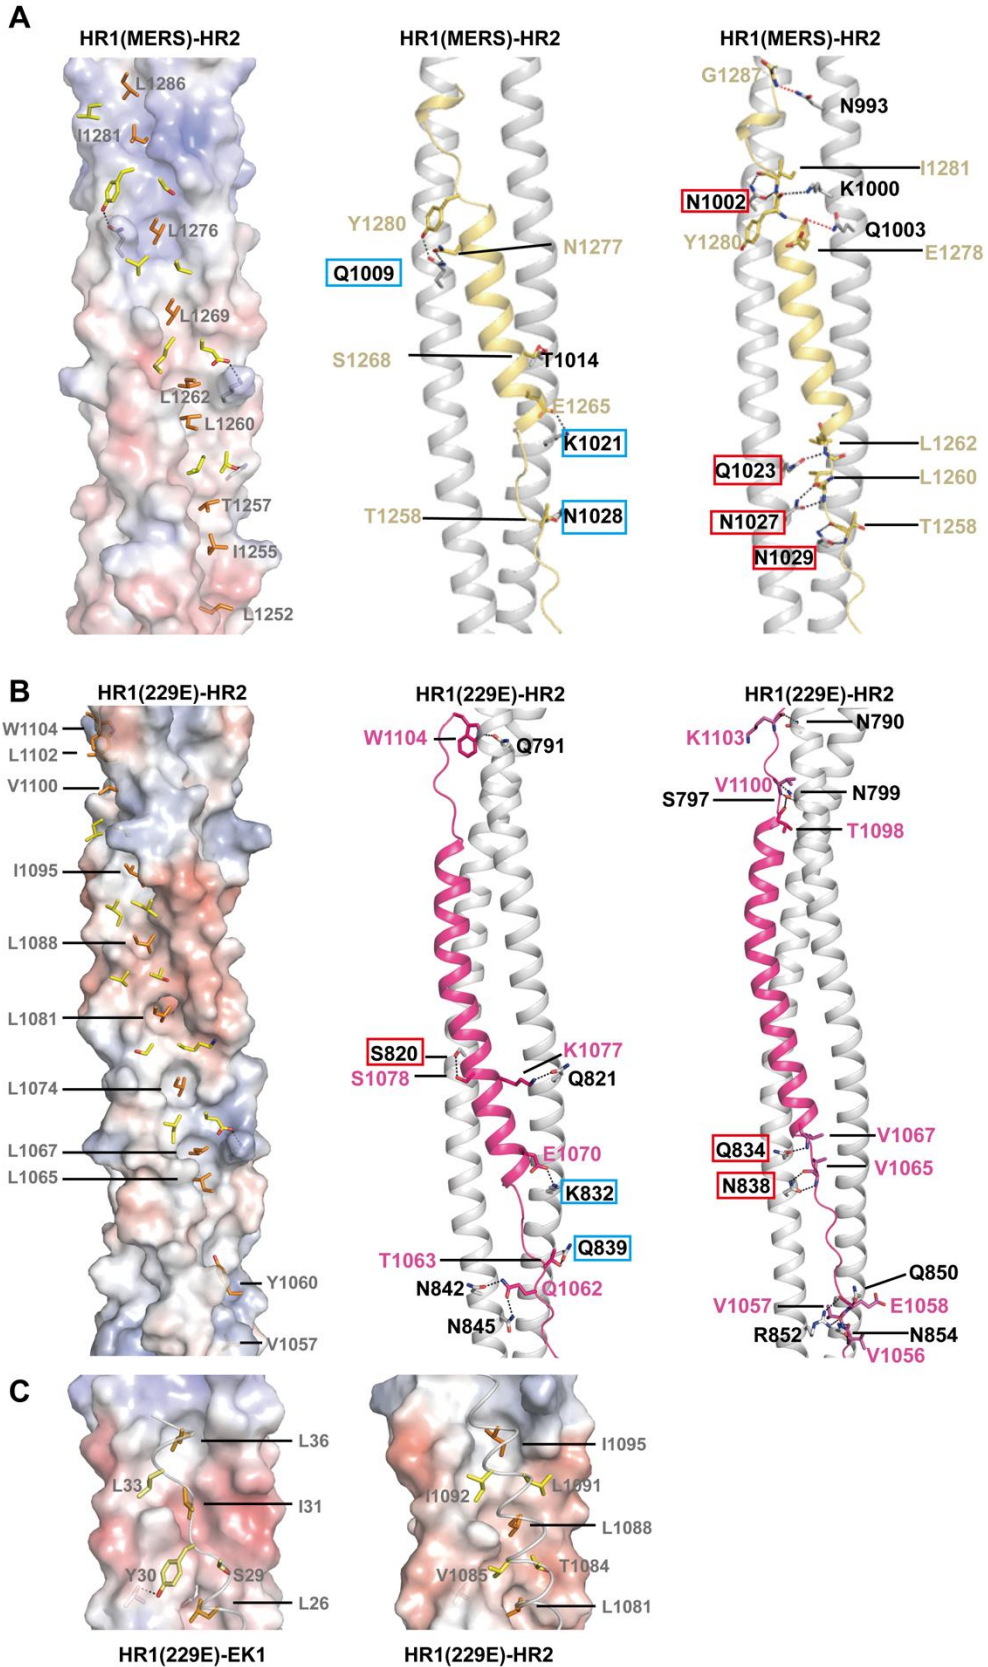



**Fig. S6. Interactions between the HR1 and HR2 motifs of MERS and 229E.** Hydrophobic interactions (left panel), side-chain to side-chain hydrophilic interactions (middle panel) and side-chain to main-chain polar interactions (right panel) between the HR1 and HR2 motifs of MERS-CoV (**A**) and HCoV-229E (**B**). (A-B) Left panel: HR2 residues that are involved in hydrophobic packing are shown as stick models on the electrostatic surfaces of 3HR1 cores. For clarity, only ‘burying residues’ are labeled in grey. Middle and right panel: HR1 residues that are highlighted in cyan (middle panel) and red (right panel) boxes are the same residues that mediate conserved side-chain to side-chain and side-chain to main-chain hydrophilic interactions with EK1 residues. (C) Close-up view of the C-terminal extended region of EK1 in the HR1(229E)-EK1 structure (left) and its equivalent region in the HR1(229E)-HR2 structure (right).

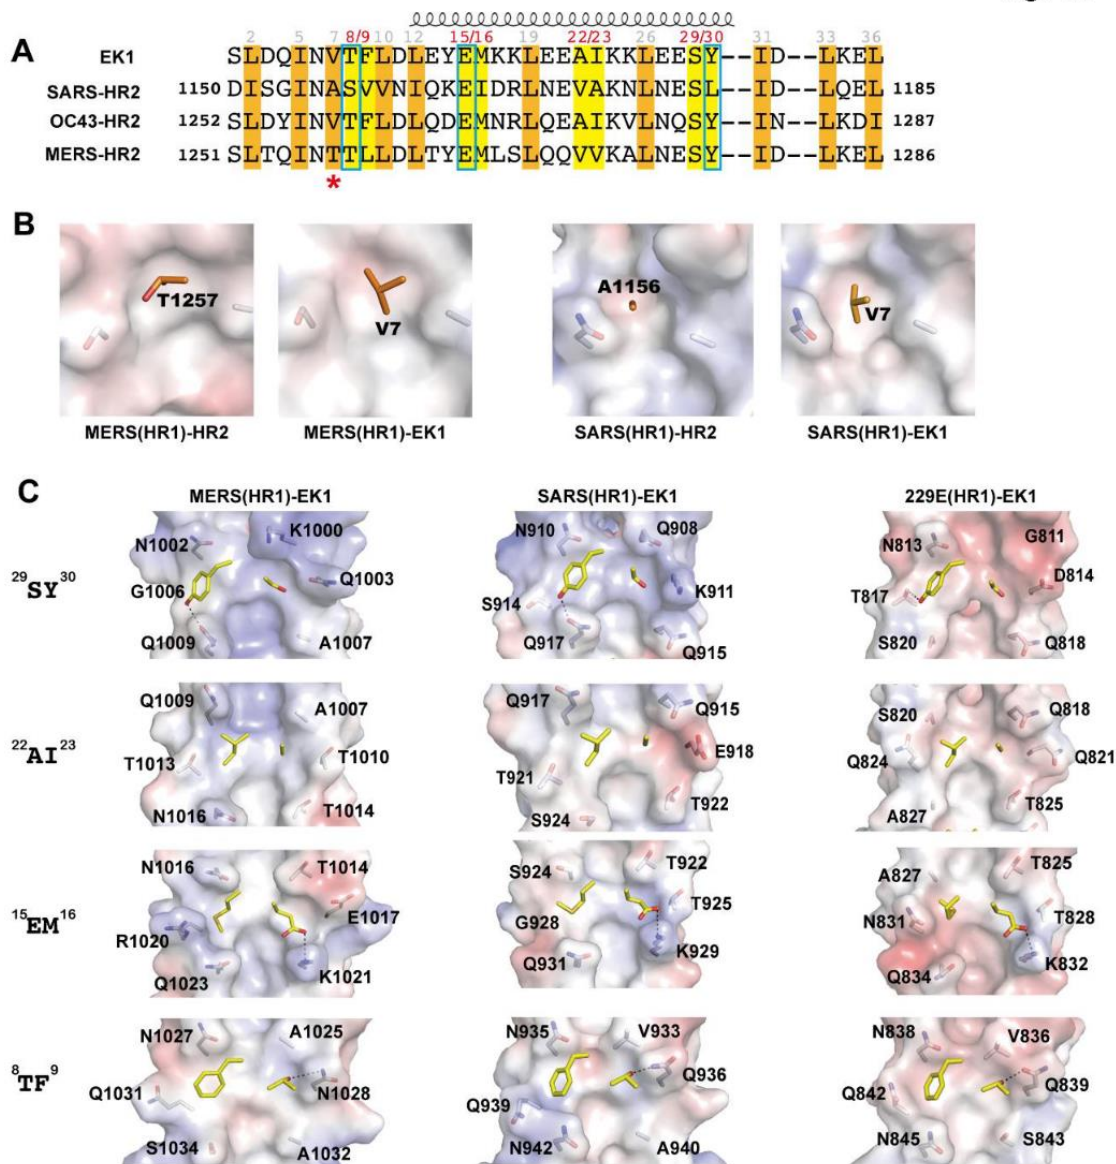

**Fig. S7. Key residues at critical positions endow EK1 and OC43-HR2 with pan-CoV activity.** (A) Schematic representation illustrating the similarity and variation of the burying and packing residues across different  $\alpha$ -HCoVs. (B) V7EK1 outcompetes native T1257MERS and A1156SARS at corresponding position for fitting onto HR1. (C) Surface representation illustrating how ridge-packing residues from EK1 can accommodate the different shapes and electrostatic potential of ridges from different HCoVs.

**Table S1. Inhibitory activity of peptides on multiple cell-cell fusion assays.**

| Cell-cell fusion assays | Inhibitory activity of peptides, IC <sub>50</sub> (μM) |           |          |           |           |           |           |           |           |       |           |           |       |
|-------------------------|--------------------------------------------------------|-----------|----------|-----------|-----------|-----------|-----------|-----------|-----------|-------|-----------|-----------|-------|
|                         | SARS-CoV                                               |           | MERS-CoV |           | HCoV-229E |           | HCoV-NL63 |           | HCoV-OC43 |       | EK1       | Scrambled |       |
|                         | HR1P                                                   | HR2P      | HR1P     | HR2P      | HR1P      | HR2P      | HR1P      | HR2P      | HR1P      | HR2P  |           |           |       |
| <b>SARS-CoV</b>         | >5.00                                                  | 0.52±0.11 | >5.00    | >5.00     | >5.00     | >5.00     | >5.00     | >5.00     | >5.00     | >5.00 | 0.54±0.11 | 0.27±0.01 | >5.00 |
| <b>MERS-CoV</b>         | >5.00                                                  | >5.00     | >5.00    | 1.01±0.13 | >5.00     | >5.00     | >5.00     | >5.00     | >5.00     | >5.00 | 0.39±0.08 | 0.18±0.01 | >5.00 |
| <b>HCoV-229E</b>        | >5.00                                                  | >5.00     | >5.00    | >5.00     | >5.00     | 0.13±0.02 | >5.00     | 0.56±0.09 | >5.00     | >5.00 | 0.84±0.19 | 0.15±0.01 | >5.00 |
| <b>HCoV-NL63</b>        | >5.00                                                  | >5.00     | >5.00    | >5.00     | >5.00     | 0.51±0.06 | >5.00     | 0.21±0.02 | >5.00     | >5.00 | 0.94±0.11 | 0.63±0.18 | >5.00 |
| <b>HCoV-OC43</b>        | >5.00                                                  | >5.00     | >5.00    | >5.00     | >5.00     | >5.00     | >5.00     | >5.00     | >5.00     | >5.00 | 0.66±0.16 | 0.33±0.05 | >5.00 |

IC<sub>50</sub>: Concentration of peptide at which 50% of HCoV S-mediated cell–cell fusion is blocked. Values greater than 5 μM are in a gray background; 1-5 μM in a green background; 0.5-1 μM in an orange background; and less than 0.5 μM in a red background.

**Table S2. Solubility and fusion inhibitory activities of different peptides.**

| Peptide          | Sequence                                                                                                           | Solubility ( $\mu\text{M}$ ) in |            |           | $\text{IC}_{50}$ of cell-cell fusion ( $\mu\text{M}$ ) |           |           |           |  |
|------------------|--------------------------------------------------------------------------------------------------------------------|---------------------------------|------------|-----------|--------------------------------------------------------|-----------|-----------|-----------|--|
|                  |                                                                                                                    | PBS (pH=7.2)                    | Water      | MERS-CoV  | SARS-CoV                                               | HCoV-229E | HCoV-NL63 | HCoV-OC43 |  |
| <b>OC43-HR2P</b> | SLDYINVTFLDLQDEMNRLEAIKVLNQSINLKDI                                                                                 | 445±7                           | 44±5       | 0.36±0.07 | 0.54±0.07                                              | 0.93±0.04 | 0.99±0.14 | 0.52±0.10 |  |
| <b>EK0-1</b>     | SLDYINVTFLDLQDEM <b><i>KKLE</i></b> EAIK <b><i>KLE</i></b> QSYINLKDI                                               | 219±14                          | 9511±272   | 0.32±0.03 | 0.31±0.03                                              | 0.30±0.05 | 0.78±0.10 | 0.42±0.04 |  |
| <b>EK0-2</b>     | SLDYINVTFLDL <b><i>E</i></b> DEM <b><i>KKLE</i></b> EAIK <b><i>KLEES</i></b> YINL <b><i>KEI</i></b>                | 528±19                          | 10683±454  | 0.26±0.02 | 0.25±0.02                                              | 0.22±0.05 | 0.63±0.12 | 0.53±0.15 |  |
| <b>EK0-3</b>     | SLD <b><i>Q</i></b> INVTFLDL <b><i>EYEM</i></b> <b><i>KKLE</i></b> EAIK <b><i>KLEES</i></b> YIDL <b><i>KEI</i></b> | 1083±83                         | 19421±238  | 0.22±0.04 | 0.25±0.02                                              | 0.32±0.03 | 0.78±0.18 | 0.49±0.11 |  |
| <b>EK1</b>       | SLD <b><i>Q</i></b> INVTFLDL <b><i>EYEM</i></b> <b><i>KKLE</i></b> EAIK <b><i>KLEES</i></b> YIDL <b><i>KEL</i></b> | 1542±115                        | 20953±1154 | 0.19±0.01 | 0.21±0.01                                              | 0.20±0.05 | 0.62±0.17 | 0.39±0.04 |  |

$\text{IC}_{50}$ : Concentration of peptide at which 50% of HCoV S-mediated cell–cell fusion was blocked.

\*The introduced Glu (E), Lys (K) and other residues are highlighted in red, bold and italics.

**Table S3. Data collection and structural refinement statistics.**

|                                          | HR1(MERS)-EK1         | HR1(SARS)-EK1                    | HR1(229E)-EK1          |
|------------------------------------------|-----------------------|----------------------------------|------------------------|
| <b>Data collection statistics</b>        |                       |                                  |                        |
| Resolution range (Å)*                    | 25.8-3.31 (3.43-3.31) | 34.5-3.30(3.42-3.30)             | 44.4- 2.21 (2.29-2.21) |
| Space group                              | P3 <sub>1</sub> 21    | P4 <sub>3</sub> 2 <sub>1</sub> 2 | C121                   |
| Unit cell (Å,°)                          | 60.3 60.3 175.2       | 101.0 101.0 73.4                 | 95.6 45.6 94.8         |
|                                          | 90 90 120             | 90 90 90                         | 90 96.3 90             |
| Unique reflections*                      | 5955 (564)            | 6070 (595)                       | 20,441 (1954)          |
| Redundancy*                              | 11.7 (11.8)           | 8.1 (7.8)                        | 4.7 (4.5)              |
| Completeness (%)*                        | 99.9 (100)            | 99.9 (100)                       | 99.4 (99.5)            |
| Mean I/s*                                | 20.7 (2.5)            | 11.9 (1.5)                       | 18.9 (5.0)             |
| Wilson B (Å <sup>2</sup> )               | 109                   | 98                               | 26                     |
| R <sub>meas</sub> (%)*, a                | 12.2 (77.5)           | 17.2 (102.4)                     | 8.7 (21.7)             |
| R <sub>pim</sub> (%)*, b                 | 3.6 (32.4)            | 6.0 (36.3)                       | 4.0 (9.7)              |
| CC <sub>1/2</sub> *, c                   | (0.897)               | (0.740)                          | (0.979)                |
| <b>Refinement statistics</b>             |                       |                                  |                        |
| Reflections used in refinement*          | 5953 (564)            | 6060 (595)                       | 20,374 (1952)          |
| Reflections used for R <sub>free</sub> * | 339 (23)              | 307 (40)                         | 1017 (106)             |
| R <sub>work</sub> (%)*, d                | 25.9 (34.0)           | 25.3 (31.4)                      | 21.0 (23.0)            |
| R <sub>free</sub> (%)*, d                | 31.4 (31.8)           | 30.9 (34.5)                      | 24.7 (30.4)            |
| Protein atoms                            | 2341                  | 2443                             | 2950                   |
| Solvent atoms                            | 0                     | 0                                | 110                    |
| Ligand atoms                             | 0                     | 0                                | 2                      |
| RMSD bond length (Å)                     | 0.003                 | 0.01                             | 0.01                   |
| RMSD bond angles (°)                     | 0.56                  | 1.17                             | 1.22                   |
| Average B-values (Å <sup>2</sup> )       | 117                   | 113                              | 43                     |
| Protein                                  | 117                   | 113                              | 43                     |
| Solvent                                  | 0                     | 0                                | 44                     |
| Ramachandran favored (%)                 | 98.6                  | 99.0                             | 98.6                   |
| Ramachandran allowed (%)                 | 1.4                   | 1.0                              | 1.4                    |

Ramachandran outliers (%)            0                                    0                                    0

---

\*Statistics for the highest-resolution shell are shown in parentheses.

$$^a R_{meas} = \frac{\sum_{hkl} \left[ \frac{N(hkl)}{N(hkl)-1} \right]^{\frac{1}{2}} \times \sum_i |I_i(hkl) - \langle I(hkl) \rangle|}{\sum_{hkl} \sum_i I_i(hkl)}$$

$$^b R_{pim} = \frac{\sum_{hkl} \left[ \frac{1}{N(hkl)-1} \right]^{\frac{1}{2}} \times \sum_i |I_i(hkl) - \langle I(hkl) \rangle|}{\sum_{hkl} \sum_i I_i(hkl)}$$

$$^c CC_{\frac{1}{2}} = \frac{\sum (x-\langle x \rangle)(y-\langle y \rangle)}{[\sum (x-\langle x \rangle)^2 \sum (y-\langle y \rangle)^2]^{\frac{1}{2}}}$$

$^d R_{work} = \frac{\sum |F_{obs}| - |F_{calc}|}{\sum |F_{obs}|}$ ;  $R_{free}$  is defined as  $R_{work}$  calculated from 5% of the reflections that were excluded from refinement.
